# Supplementary material for: Potential Role of Pig UCP3 in Modulating Adipocyte Browning via the Beta-Adrenergic Receptor Signaling Pathway
Source: MDPI journal article supplement (doi:10.3390/biology13050284), 2024-04-23
Supplement: s1 [file s1]

# Supplementary Materials

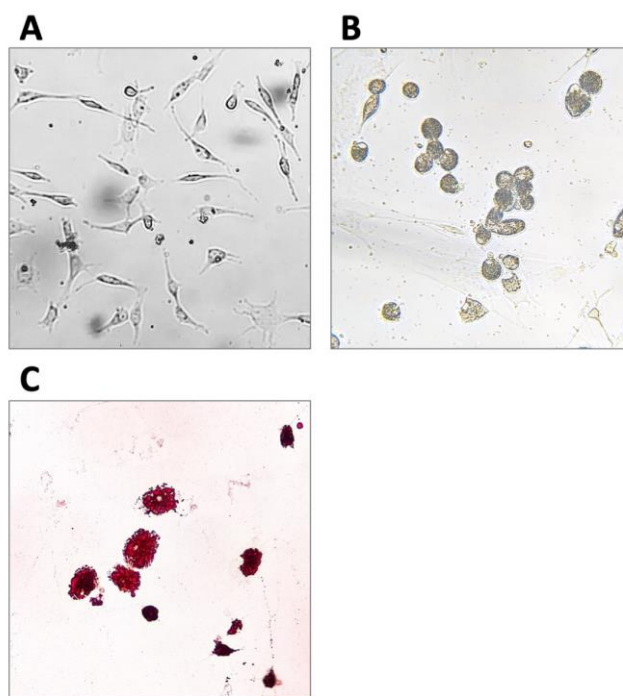

**Supplementary Figure S1.** Cell morphology changes demonstrating success of the pig adipocyte dedifferentiation-redifferentiation process prior to browning experiments. (A) Dedifferentiation of mature adipocytes to DFAT resulted in a fibroblast-like cell morphology. (B) Redifferentiation of DFAT to adipocytes resulted in a rounded cell morphology. (C) Staining of lipid using Oil Red O.

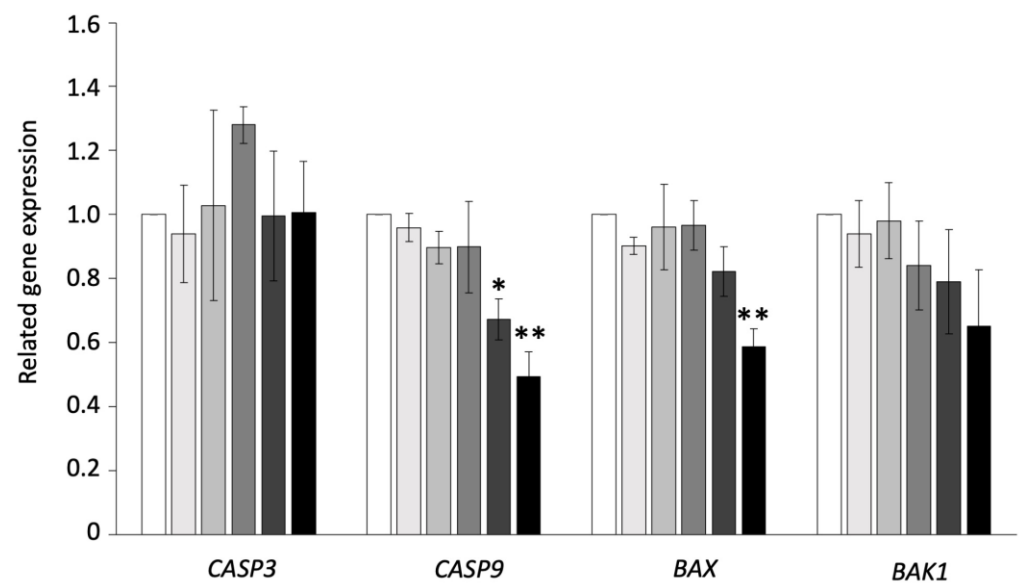

**Supplementary Figure S2.** Gene expressions related to apoptosis of pig redifferentiated adipocytes after isoproterenol administration. The values of the treatment and control groups were compared. The experiments were conducted 4 times. Each color indicates a concentration of isoproterenol: (□) control, (□) 0.01  $\mu\text{M}$ , (□) 0.1  $\mu\text{M}$ , (■) 1  $\mu\text{M}$ , (■) 10  $\mu\text{M}$ , and (■) 100  $\mu\text{M}$ . The values are shown as mean  $\pm$  SEM. \*  $p < 0.05$  and \*\*  $p < 0.01$ .

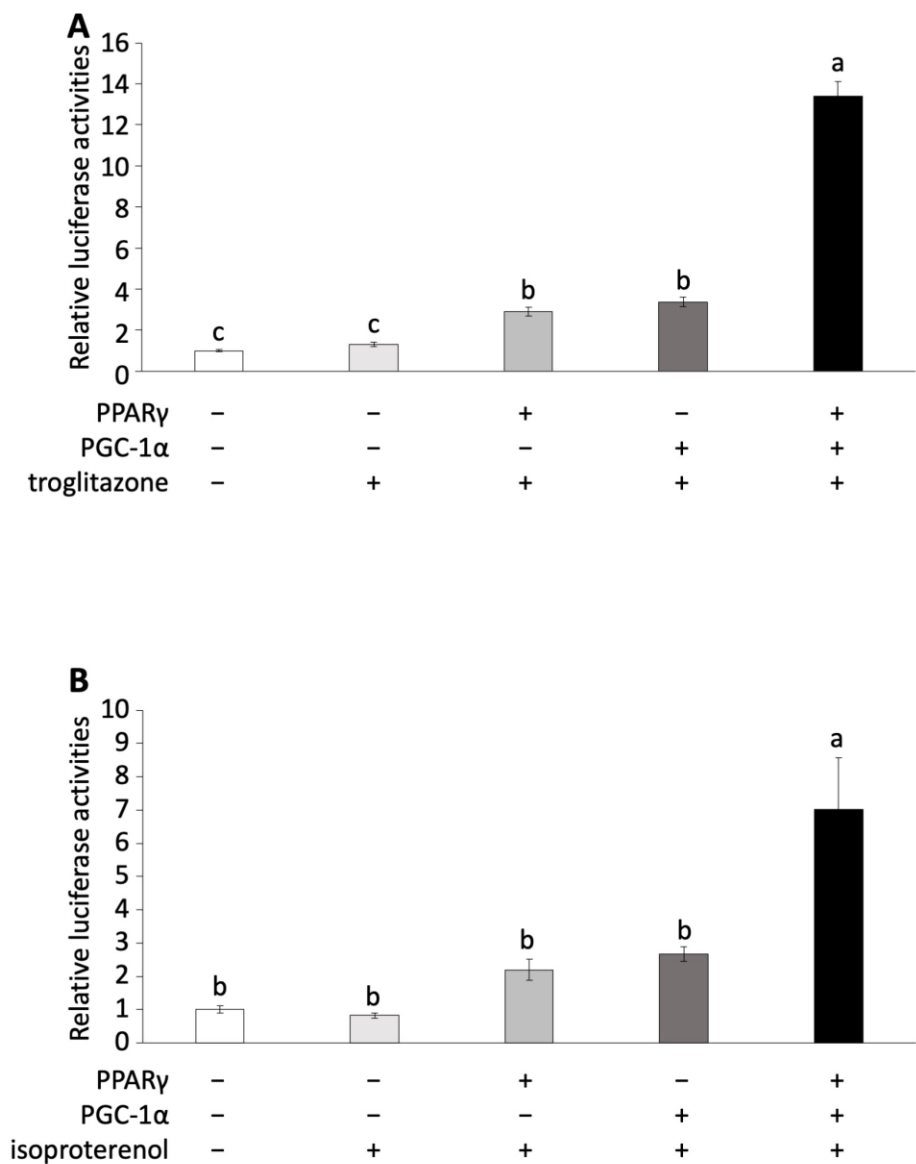

**Supplementary Figure S3.** Luciferase assay of pig UCP promoter region and alignment analysis. (A) Luciferase assay using Hela cells transfected with *PPAR $\gamma$*  or/and *PGC-1 $\alpha$*  with/without 5  $\mu$ M troglitazone. The experiments were conducted 4 times. (B) Luciferase assay using Hela cells transfected with *PPAR $\gamma$*  or/and *PGC-1 $\alpha$*  with 1  $\mu$ M isoproterenol. The experiments were conducted thrice. The values are shown as mean  $\pm$  SEM. Significant differences are indicated by different signs.

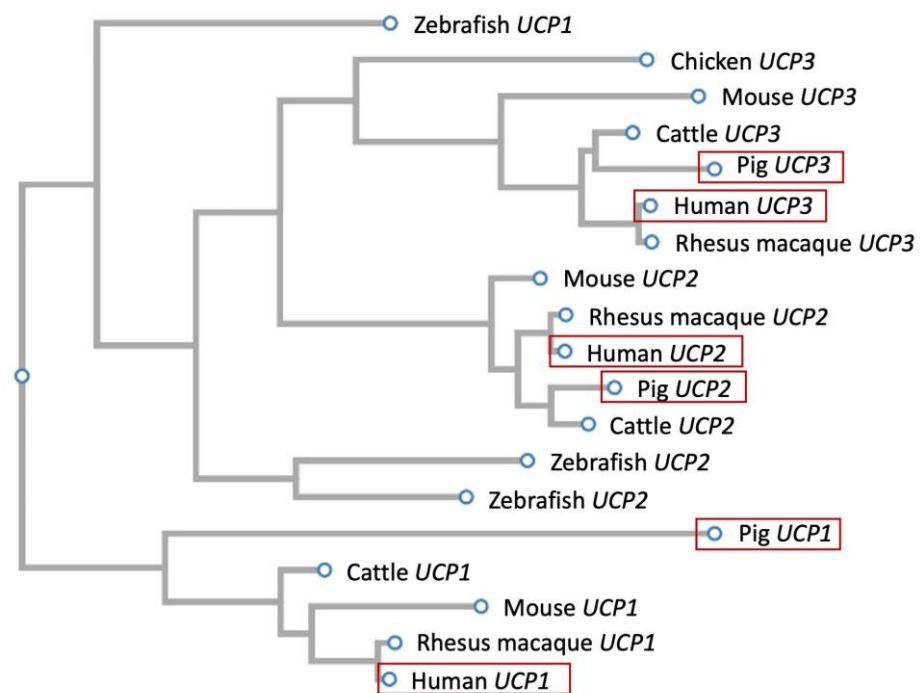

**Supplementary Figure S4.** Tree diagram of UCP family mRNA sequences in vertebrates. The red-line boxes indicate pig and human genes.

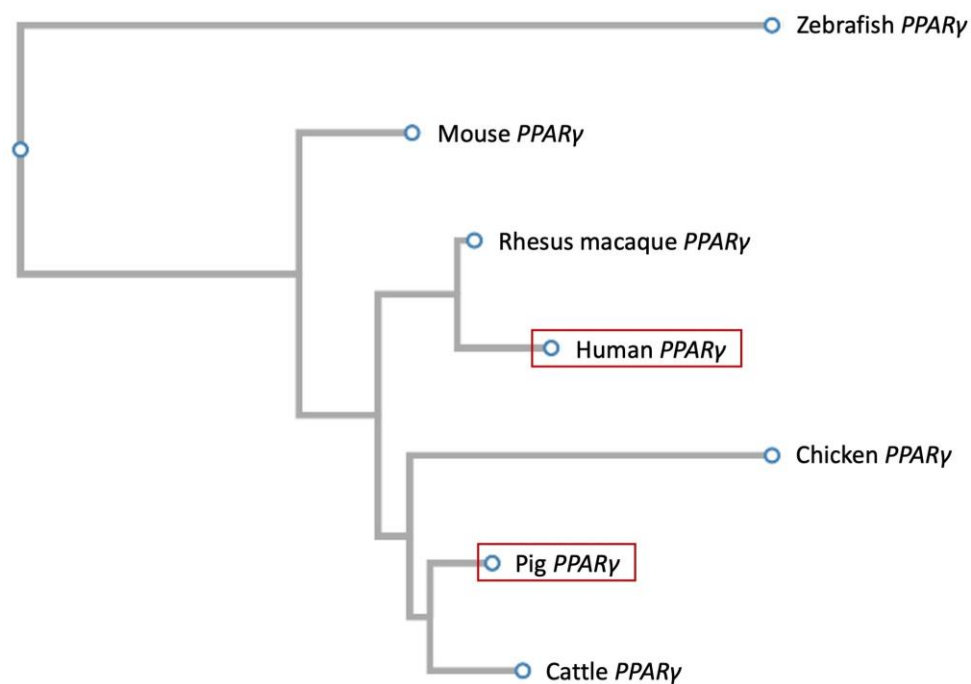

**Supplementary Figure S5.** Tree diagram of *PPARγ* mRNA sequences in vertebrates. The redline boxes indicate pig and human genes.

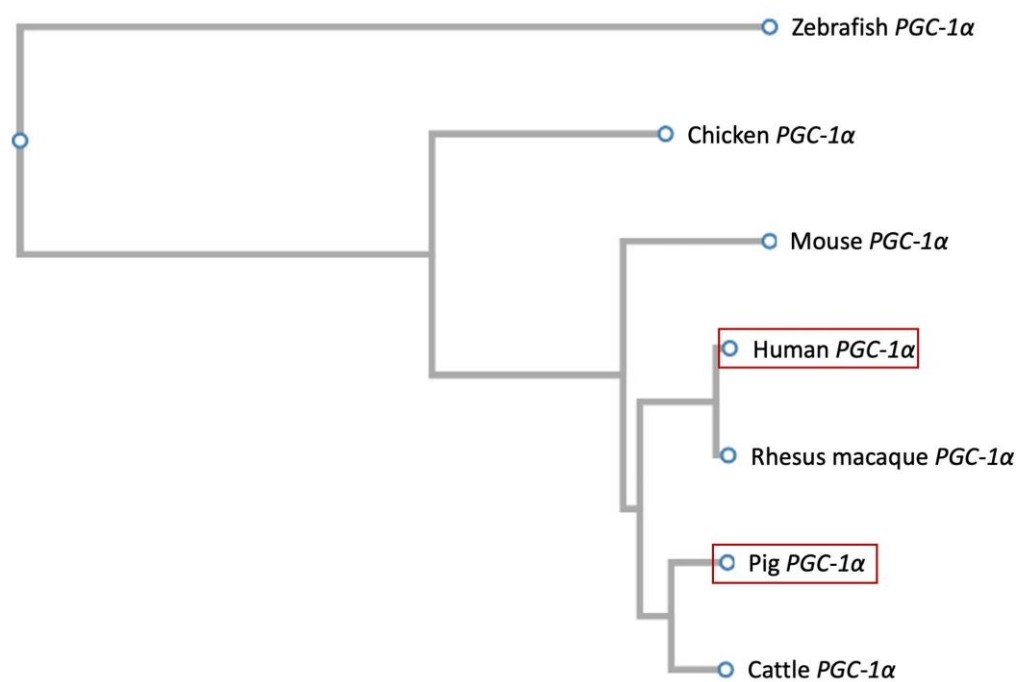

**Supplementary Figure S6.** Tree diagram of *PGC-1α* mRNA sequences in vertebrates. The redline boxes indicate pig and human genes.

**Supplementary Table S1.** Primer pairs used in the analysis of gene expressions.

| Gene                            |   | Primer                  | Product Length (bp) | Annealing Temperature (°C) | Accession Number |
|---------------------------------|---|-------------------------|---------------------|----------------------------|------------------|
| <i>PGC-1<math>\alpha</math></i> | F | CATGTGCAACCAGGACTCTG    | 133                 | 60                         | NM_213963        |
|                                 | R | GCTGTCTGTATCCAAGTCGTTC  |                     |                            |                  |
| <i>PPAR<math>\gamma</math></i>  | F | AGGACTACCAAAGTGCCATCAAA | 142                 | 60                         | NM_214379        |
|                                 | R | GAGGCTTTATCCCCACAGACAC  |                     |                            |                  |
| <i>UCP1</i>                     | F | GCAGGGCAGACAGGTAAGC     | 134                 | 60                         | XM_021100543.1   |
|                                 | R | CAAATAGTCCCGCCAAACCA    |                     |                            |                  |
| <i>UCP2</i>                     | F | CCTCAGTGTGAGACCTGACGAA  | 148                 | 60                         | NM_214289        |
|                                 | R | CTGTGGCCTTGAATCCAACCA   |                     |                            |                  |
| <i>UCP3</i>                     | F | ATTCCAGGCCAGCATAACACG   | 165                 | 60                         | NM_214049        |
|                                 | R | GTCACCATCTCGGCACAGTT    |                     |                            |                  |
| <i>CS</i>                       | F | GGCTGACCTTATACCTAAGGAGC | 230                 | 60                         | NM_214276.1      |
|                                 | R | GTTCTTCCCCACCCTTAGCC    |                     |                            |                  |
| <i>CASP3</i>                    | F | TGTGGGATTGAGACGGACAG    | 131                 | 60                         | NM_214131.1      |
|                                 | R | GATCCGTCCTTTGAATTTGCGCC |                     |                            |                  |
| <i>CASP9</i>                    | F | CCAGTGGACATTGGTTCTGGA   | 247                 | 60                         | XM_003127618.4   |
|                                 | R | TGGCAGTCAGGTTGCACTTC    |                     |                            |                  |
| <i>BAX</i>                      | F | GCCTCAGGATGCATCTACCAA   | 170                 | 60                         | XM_003127290.5   |
|                                 | R | AGTTGAAGTTGCCGTCAGCA    |                     |                            |                  |
| <i>BAK1</i>                     | F | CTAGAACCTAGCAGCACCATGG  | 156                 | 60                         | XM_021098603.1   |
|                                 | R | GGAGGCGATCTTGGTGAAGTAC  |                     |                            |                  |
| <i>ACTB</i>                     | F | AGATCAAGATCATCGCGCCTC   | 159                 | 60                         | DQ845171.1       |
|                                 | R | AGTCCGCCTAGAAGCATTTC    |                     |                            |                  |

**Supplementary Table S2.** Alignment scores of thermogenesis genes among mammals.

|                                 | <b>Pig<br/>Human</b> | <b>Pig<br/>Mouse</b> | <b>Pig<br/>Cattle</b> | <b>Human<br/>Mouse</b> | <b>Human<br/>Cattle</b> | <b>Mouse<br/>Cattle</b> |
|---------------------------------|----------------------|----------------------|-----------------------|------------------------|-------------------------|-------------------------|
| <i>PPAR<math>\gamma</math></i>  | 85                   | 84                   | 86                    | 84                     | 78                      | 76                      |
| <i>PGC-1<math>\alpha</math></i> | 91                   | 90                   | 95                    | 86                     | 90                      | 88                      |
| <i>UCP1</i>                     | 30                   | 29                   | 33                    | 70                     | 80                      | 72                      |
| <i>UCP2</i>                     | 84                   | 79                   | 86                    | 83                     | 84                      | 80                      |
| <i>UCP3</i>                     | 73                   | 52                   | 82                    | 68                     | 86                      | 76                      |

Alignment scores were calculated using mRNA sequences of *PPAR $\gamma$* , *PGC-1 $\alpha$* , *UCP1*, *UCP2*, and *UCP3* in pigs, humans, mice, and cattle. The heights of the alignment scores indicate the homology of mRNA between two species.



**Supplementary Table S3.** Alignment scores of the promoter regions in the UCP family among mammals.

|             | Pig<br>Human | Pig<br>Mouse | Pig<br>Cattle | Human<br>Mouse | Human<br>Cattle | Mouse<br>Cattle |
|-------------|--------------|--------------|---------------|----------------|-----------------|-----------------|
| <i>UCP1</i> | 53           | 6            | 66            | 18             | 46              | 5               |
| <i>UCP2</i> | 5            | 3            | 5             | 22             | 53              | 3               |
| <i>UCP3</i> | 23           | 18           | 25            | 21             | 60              | 19              |

Alignment score calculations in the promoter region used the sequence of 1,000 bp upstream from the transcriptional start site in *UCP1*, *UCP2*, and *UCP3*.
